# Supplementary material
Source: PubMed Central journal article supplement (PMC3625485)
Supplement: NIHMS433318-supplement-01.pdf [file NIHMS433318-supplement-01.pdf]

Supplementary Fig. 1

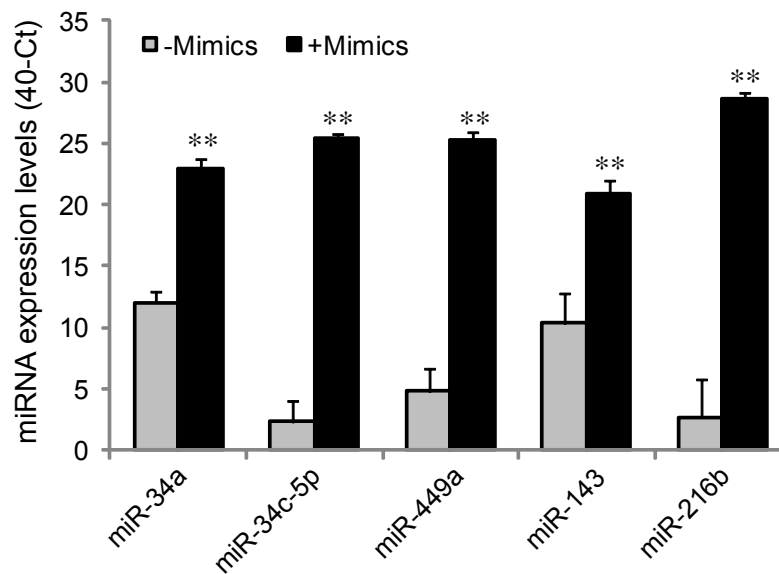

**Supplementary Fig. 1.** Expression levels of miR-34a, miR-34c-5p, miR-449a, miR-143 and miR-216b in transfected and non-transfected HepG2 cells.

HepG2 cells were transfected with 100 pmol of miRNA mimics (+mimics) or non-transfected (-mimics) for 48 h. Total RNA was extracted using the mirVana miRNA isolation kit. Synthesis of cDNA was performed using specific reverse transcription primers and Taqman miRNA Reverse Transcription Kit (Applied Biosystems). The expressions of mature miRNAs were detected by qPCR using Taqman miRNA assays with U6 snRNA as the internal control. Data are represented as the 40-Ct  $\pm$  SD, from three different experiments. \*\*p<0.01 indicates a significant difference compared to without mimic treatment (-mimics).
